# Supplementary material for: Distinct Differences in Emotional Recognition According to Severity of Psychotic Symptoms in Early-Stage Schizophrenia
Source: PubMed Central journal article supplement (PMC6699582; doi:10.3389/fpsyt.2019.00564), 2019-08-12
Supplement: DataSheet_1.pdf [file DataSheet_1.pdf]

## How the stimulus photographs were selected from the Korean Facial Expressions of Emotion (KOFEE) database

There are 176 photographs of 15 performers (seven male, eight female) on the KOFEE database that have passed reliability tests. Of the eight female photographs, only four conveyed all eight emotions. Four women with all eight emotions and four men in the order of highest mean reliability were selected for the actual test, and even the same person chose to be highly reliable if they had multiple pictures of one emotion. The mean reliability was calculated as the average of the eight emotional reliabilities. The subject codes and photograph numbers used in the actual test are shown in Table 1. Next, two men and two women with high mean reliability were selected for the practice session. Similarly, we selected the photographs with high reliability among the many available. Table 2 shows the subject codes and photograph numbers used in the practice session.

The use of all the photographs was approved by the original author of the KOFEE database.

**Table 1. Subject codes and the numbers of the photographs used in the actual test from the KOFEE**

| ID/Sex    | Happiness | Disgust | Anger | Sadness | Surprise | Fear | Contempt | Neutral |
|-----------|-----------|---------|-------|---------|----------|------|----------|---------|
| DY/male   | 8301      | 8374    | 8558  | 8491    | 8325     | 8338 | 8502     | 8295    |
| JM/male   | 8111      | 8082    | 8092  | 8119    | 8064     | 8071 | 8129     | 8062    |
| KD/male   | 9822      | 9880    | 9990  | 9951    | 9832     | 9850 | 9962     | 9813    |
| EW/male   | 8952      | 8993    | 9025  | 9053    | 8964     | 8983 | 9070     | 8946    |
| BM/female | 7950      | 7874    | 7927  | 7956    | 7840     | 7855 | 7963     | 7835    |
| YJ/female | 8675      | 8755    | 8894  | 8841    | 8688     | 8740 | 8357     | 8671    |
| SJ/female | 8287      | 8223    | 8276  | 8300    | 8204     | 8213 | 8315     | 8197    |
| SR/female | 9014      | 9060    | 9122  | 9142    | 9026     | 9046 | 9155     | 9006    |

**Table 2. Subject codes and the numbers of the photographs used in the practice session from the KOFEE**

| ID/Sex    | Happiness | Disgust | Anger | Sadness | Surprise | Fear | Contempt | Neutral |
|-----------|-----------|---------|-------|---------|----------|------|----------|---------|
| DS/male   | 8950      | 8885    | 8896  | 8967    | 8858     | 8873 | 8995     | 8847    |
| HJ/male   | 9519      | 9580    | 9605  | 9619    | 9542     | 9549 | 9629     | 9513    |
| DB/female | 9176      | 9267    | 9318  | 9337    | 9188     | -    | 9361     | 9171    |
| JS/female | 8576      | 8622    | 8633  | 8647    | 8588     | -    | 8660     | 8567    |
